# Supplementary material for: An Essential Viral Transcription Activator Modulates Chromatin Dynamics
Source: PubMed Central journal article supplement (PMC5004865; doi:10.1371/journal.ppat.1005842), 2016-08-30
Supplement: ppat.1005842.s001.pdf [file ppat.1005842.s001.pdf]

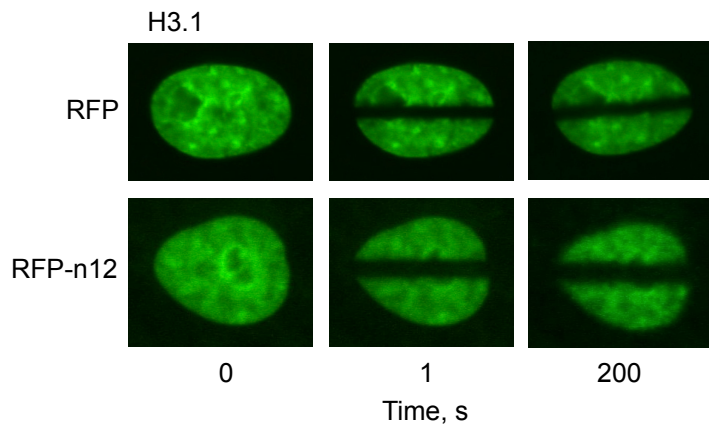

**S1 Fig. RFP or RFP-n12 do not alter the nuclear distribution of H3.1.**

Representative images of fluorescent nuclei expressing GFP-H3.1 and detectable or undetectable levels of RFP or RFP-n12, immediately prior to ( $T = 0$ ) or after ( $T = 1$ ) photobleaching, or 200 secs later.
